# Supplementary material for: Photoluminescent carbogenic nanoparticles directly derived from crude biomass
Source: Royal Society of Chemistry journal article supplement (doi:10.1039/c2gc35907c), 2012-01-01
Supplement: c2gc35907c.pdf [file c2gc35907c.pdf]

## Supporting Information:

### Photoluminescent carbogenic nanoparticles directly derived from crude biomass.

Marta J. Krysmann, Antonios Kelarakis, Emmanuel P. Giannelis\*.

Department of Materials Science and Engineering, Cornell University, Ithaca, New York 14853, United States

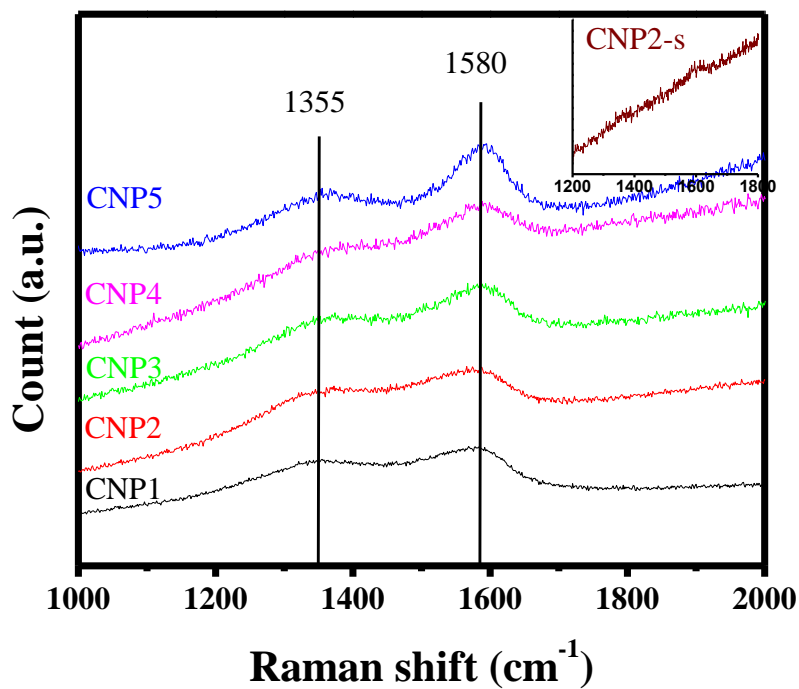

**S.I. Figure 1.** Raman spectra of CNP1, CNP2-s (inset) CNP2, CNP3, CNP4 and CNP5.

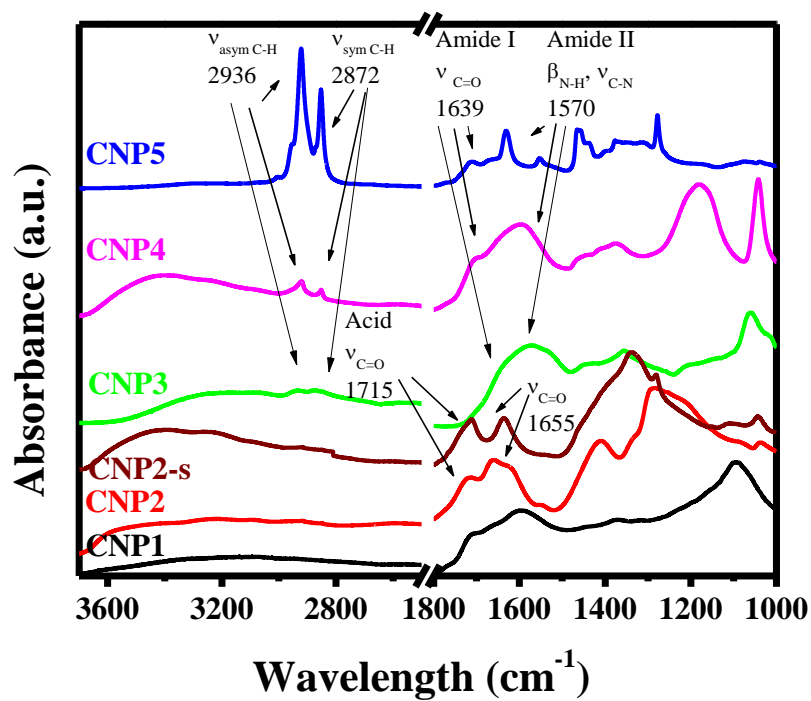

**S.I. Figure 2.** FTIR spectra of CNP1, CNP2, CNP2-s, CNP3, CNP4 and CNP5. Peaks that correspond to functional groups mentioned in the text are noted and identified.

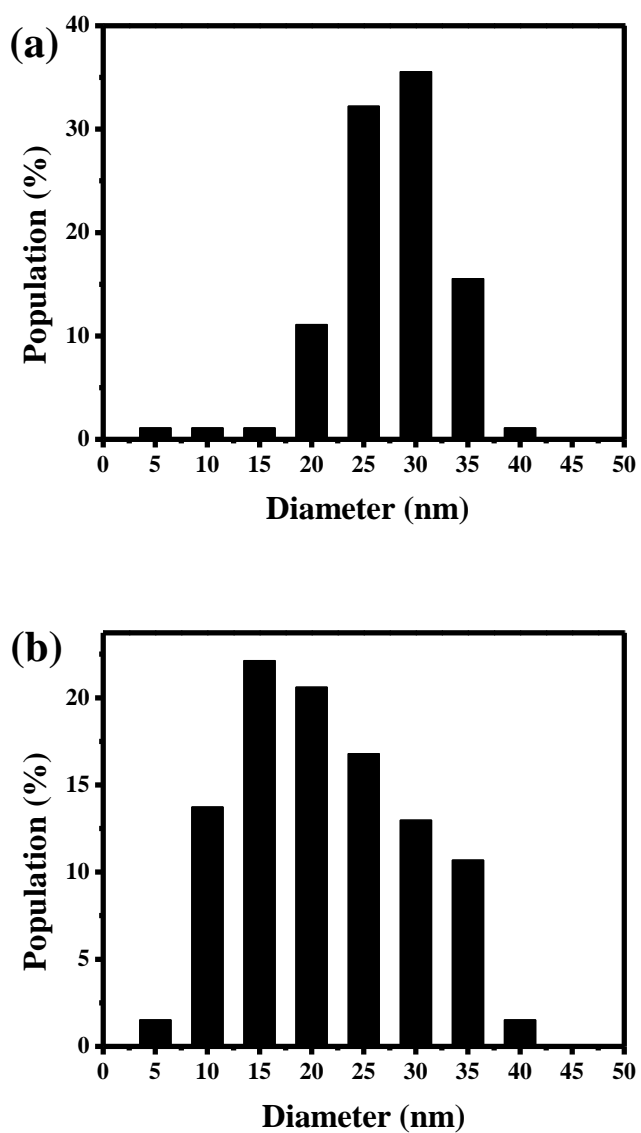

**S.I. Figure 3.** Size histograms (each one plotted based on 150 fields) derived from TEM imaging of CNP3 before (a) and after (b) they have been exposed for 11 days to hostile environment.
